# Supplementary material
Source: HighWire-hosted journal article supplement (https://cmajopen.ca/highwire/filestream/81065/field_highwire_adjunct_files/0/2017-0082-1-at.pdf)
Supplement: 2017-0082-1-at.pdf [file 2017-0082-1-at.pdf]

**Appendix 1 (as supplied by the authors):** Multilevel logistic regression model (full model)

**Supplementary Table S1:** Multilevel logistic regression model (full model), odds ratio (OR) and confidence interval (CI) are provided

|                                                   | Model A.0      |              |            | Model A.1.0   |                        |            | Model A.2.0    |                      |            | Model A.3.0  |                      |            |
|---------------------------------------------------|----------------|--------------|------------|---------------|------------------------|------------|----------------|----------------------|------------|--------------|----------------------|------------|
|                                                   | OR             | CI           | Sig.       | OR            | CI                     | Sig.       | OR             | CI                   | Sig.       | OR           | CI                   | Sig.       |
| <b>Gender (reference: men)</b>                    |                |              |            |               |                        |            |                |                      |            |              |                      |            |
| Female                                            |                |              |            | 0,896         | [0.752-5.185]          |            | 0,908          | [0.757-1.090]        |            | 0,897        | [0.753-1.068]        |            |
| <b>Age (demeaned)</b>                             |                |              |            | 0,999         | [0.993-7.078]          |            | 1,001          | [0.995-1.007]        |            | 0,999        | [0.993-1.005]        |            |
| <b>Income (reference: middle and high income)</b> |                |              |            |               |                        |            |                |                      |            |              |                      |            |
| Low income                                        |                |              |            | <b>2,065</b>  | <b>[1.731-118.140]</b> | <b>***</b> | <b>2,040</b>   | <b>[1.700-2.448]</b> | <b>***</b> | <b>2,073</b> | <b>[1.738-2.473]</b> | <b>***</b> |
| <b>Gender GP (reference: men)</b>                 |                |              |            |               |                        |            |                |                      |            |              |                      |            |
| Female                                            |                |              |            | 1,050         | [0.857-8.227]          |            | 1,033          | [0.836-1.276]        |            | 1,059        | [0.865-1.295]        |            |
| <b>Age GP (demeaned)</b>                          |                |              |            | 0,999         | [0.989-7.078]          |            | 1,001          | [0.991-1.011]        |            | 0,999        | [0.989-1.009]        |            |
| <b>Location GP practice (reference: urban)</b>    |                |              |            |               |                        |            |                |                      |            |              |                      |            |
| Rural                                             |                |              |            | 0,921         | [0.713-5.605]          |            | 0,857          | [0.653-1.126]        |            | 0,922        | [0.713-1.192]        |            |
| <b>Person centred care</b>                        |                |              |            |               |                        |            | <b>0,923</b>   | <b>[0.869-0.981]</b> | <b>*</b>   |              |                      |            |
| <b>Structure</b>                                  |                |              |            |               |                        |            |                |                      |            | <b>0,035</b> | <b>[0.005-0.251]</b> | <b>***</b> |
| <b>Process</b>                                    |                |              |            |               |                        |            |                |                      |            |              |                      |            |
| Access                                            |                |              |            |               |                        |            |                |                      |            |              |                      |            |
| Continuity                                        |                |              |            |               |                        |            |                |                      |            |              |                      |            |
| Coordination                                      |                |              |            |               |                        |            |                |                      |            |              |                      |            |
| Comprehensiveness                                 |                |              |            |               |                        |            |                |                      |            |              |                      |            |
| Intercept                                         | <b>- 2,682</b> | <b>0,166</b> | <b>***</b> | <b>-2,972</b> | <b>0,194</b>           | <b>***</b> | <b>- 2,542</b> | <b>0,257</b>         | <b>***</b> | <b>4,473</b> | <b>2,227</b>         | <b>*</b>   |
| Variance country                                  | <b>0,738</b>   | <b>0,215</b> | <b>***</b> | <b>0,787</b>  | <b>0,232</b>           | <b>***</b> | <b>0,833</b>   | <b>0,246</b>         | <b>***</b> | <b>0,540</b> | <b>0,167</b>         | <b>***</b> |
| Variance GP                                       | <b>0,978</b>   | <b>0,141</b> | <b>***</b> | <b>1,023</b>  | <b>0,151</b>           | <b>***</b> | <b>1,066</b>   | <b>0,159</b>         | <b>***</b> | <b>1,024</b> | <b>0,151</b>         | <b>***</b> |

\* : p < 0.05, \*\* : p < 0.01, \*\*\* : p ≤ 0.001

|                                                   | Model A.3.1  |                      |                | Model A.3.2  |                      |              | Model A.3.3    |                      |            | Model A.3.4  |                      |            |
|---------------------------------------------------|--------------|----------------------|----------------|--------------|----------------------|--------------|----------------|----------------------|------------|--------------|----------------------|------------|
|                                                   | OR           | CI                   | Sig.           | OR           | CI                   | Sig.         | OR             | CI                   | Sig.       | OR           | CI                   | Sig.       |
| <b>Gender (reference: men)</b>                    |              |                      |                |              |                      |              |                |                      |            |              |                      |            |
| Female                                            | 0,895        | [0.752-1.066]        |                | 0,895        | [0.752-1.065]        |              | 0,896          | [0.752-1.067]        |            | 0,898        | [0.754-1.069]        |            |
| <b>Age (demeaned)</b>                             | 0,999        | [0.993-1.005]        |                | 0,999        | [0.993-1.005]        |              | 0,999          | [0.993-1.005]        |            | 0,999        | [0.993-1.005]        |            |
| <b>Income (reference: middle and high income)</b> |              |                      |                |              |                      |              |                |                      |            |              |                      |            |
| Low income                                        | <b>2,083</b> | <b>[1.746-2.485]</b> | <b>***</b>     | <b>2,065</b> | <b>[1.731-2.463]</b> | <b>***</b>   | <b>2,063</b>   | <b>[1.729-2.461]</b> | <b>***</b> | <b>2,069</b> | <b>[1.734-2.468]</b> | <b>***</b> |
| <b>Gender GP (reference: men)</b>                 |              |                      |                |              |                      |              |                |                      |            |              |                      |            |
| Female                                            | 1,071        | [0.874-1.314]        |                | 1,050        | [0.857-1.288]        |              | 1,051          | [0.857-1.289]        |            | 1,049        | [0.856-1.286]        |            |
| <b>Age GP (demeaned)</b>                          | 0,999        | [0.989-1.009]        |                | 0,999        | [0.989-1.009]        |              | 0,999          | [0.989-1.009]        |            | 0,999        | [0.989-1.009]        |            |
| <b>Location GP practice (reference: urban)</b>    |              |                      |                |              |                      |              |                |                      |            |              |                      |            |
| Rural                                             | 0,921        | [0.713-1.191]        |                | 0,921        | [0.713-1.191]        |              | 0,920          | [0.712-1.190]        |            | 0,920        | [0.712-1.190]        |            |
| <b>Person centred care</b>                        |              |                      |                |              |                      |              |                |                      |            |              |                      |            |
| <b>Structure</b>                                  |              |                      |                |              |                      |              |                |                      |            |              |                      |            |
| <b>Process</b>                                    |              |                      |                |              |                      |              |                |                      |            |              |                      |            |
| Access                                            | <b>0,014</b> | <b>[0.002-0.107]</b> | <b>***</b>     |              |                      |              |                |                      |            |              |                      |            |
| Continuity                                        |              |                      |                | 0,126        | [0.001-52.815]       |              |                |                      |            |              |                      |            |
| Coordination                                      |              |                      |                |              |                      |              | 0,227          | [0.054-0.953]        |            |              |                      |            |
| Comprehensiveness                                 |              |                      |                |              |                      |              |                |                      |            | 0,136        | [0.020-0.930]        |            |
| Intercept                                         | <b>6.653</b> | <b>2.362</b>         | <b>- 0.427</b> | <b>1.264</b> | <b>- 0.427</b>       | <b>1.264</b> | <b>- 0.427</b> | <b>1.264</b>         | <b>*</b>   | <b>7,723</b> | <b>2,406</b>         | <b>**</b>  |
| Variance country                                  | <b>0.468</b> | <b>0.148</b>         | <b>0.667</b>   | <b>0.201</b> | <b>0.667</b>         | <b>0.201</b> | <b>0.667</b>   | <b>0.201</b>         | <b>***</b> | <b>0,474</b> | <b>0,152</b>         | <b>***</b> |
| Variance GP                                       | <b>1.026</b> | <b>0.151</b>         | <b>1.022</b>   | <b>0.150</b> | <b>1.022</b>         | <b>0.150</b> | <b>1.022</b>   | <b>0.150</b>         | <b>***</b> | <b>1,070</b> | <b>0,16</b>          | <b>***</b> |

\* : p < 0.05, \*\* : p < 0.01, \*\*\* : p ≤ 0.001
